# Supplementary material for: Porcine Reproductive and Respiratory Syndrome Virus Induces IL-1βProduction Depending on TLR4/MyD88 Pathway and NLRP3 Inflammasome in Primary Porcine Alveolar Macrophages
Source: Hindawi journal article supplement (doi:10.1155/2014/403515), 2014-01-01

## Supplementary Materials

**Table S1.** The siRNAs used in this study.

**Table S2.** The primers used in this study for real-time RT-PCR.

**Figure S1. Knockdown efficiency of siRNAs against RIG-I, Toll-like receptors, NLRP3 and ASC.**

(A-L) PAMs were transfected with 80 nM of psiRIG-I, psiTLR1-9, psiNLRP3 and psiASC, respectively. Cells transfected with psiNegative were used as controls. The transfected cells were collected at 24 h post-transfection to examine the endogenous transcription of porcine RIG-I, TLR1-9, NLRP3 and ASC mRNA by real-time RT-PCR. The expression level of RIG-I, TLR1-9, NLRP3 and ASC were first normalized to that of  $\beta$ -actin in the same sample and then compared with that of cells transfected with psiNegative. The presented data indicates the mRNA expression level of the tested molecules in cells transfected with specific siRNA relative to that in psiNegative-transfected cells. \*\*P < 0.01 compared with cells transfected with psiNegative.

**Table S1. The siRNAs used in this study.**

| Gene name        | Sequence region | siRNA sequence (Sense)             | siRNA sequence (Anti-sense)       |
|------------------|-----------------|------------------------------------|-----------------------------------|
| RIG-I            | 650-670         | 5'-GGU ACA AAG UUG CAG GCA UTT -3' | 5'-AUG CCU GCA ACU UUG UAC CTT-3' |
| TLR1             | 1160-1180       | 5'-CCC ACA AAG UUA CAU CUA UTT-3'  | 5'-AUA GAU GUA ACU UUG UGG GTT-3' |
| TLR2             | 1247-1267       | 5'-GCC CUU CCU ACA CAC UUU ATT-3'  | 5'-UAA AGU GUG UAG GAA GGG CTT-3' |
| TLR3             | 1795-1815       | 5'-GGU CUU GAG AAA CUA CAA ATT-3'  | 5'-UUU GUA GUU UCU CAA GAC CTT-3' |
| TLR4             | 1947-1967       | 5'-CAG GAA UCC UGG UCU AUA ATT-3'  | 5'-UUA UAG ACC AGG AUU CCU GTT-3' |
| TLR5             | 953-973         | 5'-GCC UUC AAC AAG AUA AAC ATT-3'  | 5'-UGU UUA UCU UGU UGA AGG CTT-3' |
| TLR6             | 820-840         | 5'-GCC CAA ACC UGU AGA AUA UTT-3'  | 5'-AUA UUC UAC AGG UUU GGG CTT-3' |
| TLR7             | 342-362         | 5'-CCA GAA GGC AGC AGA UUA ATT -3' | 5'-UUA AUC UGC UGC CUU CUG GTT-3' |
| TLR8             | 786-806         | 5'-GCC AGA AUC UUU GAG AGA ATT-3'  | 5'-UUC UCU CAA AGA UUC UGG CTT-3' |
| TLR9             | 1074-1094       | 5'-CCU UCA AUU ACC ACA AGA ATT-3'  | 5'-UUC UUG UGG UAA UUG AAG GTT-3' |
| NLRP3            | 3003-3023       | 5'-GCC UUA AGU UGU GUG AAA UTT-3'  | 5'-AUU UCA CAC AAC UUA AGG CTT-3' |
| ASC              | 310-330         | 5'-CCU GAA AGC AGA CAA CAA ATT-3'  | 5'-UUU GUU GUC UGC UUU CAG GTT-3' |
| Negative control |                 | 5'-UUC UCC GAA CGU GUC ACG UTT-3'  | 5'-ACG UGA CAC GUU CGG AGA ATT-3' |

**Table S2. The primers used in this study for real-time RT-PCR.**

| Gene name      | Forward primer sequence        | Reverse primer sequence         |
|----------------|--------------------------------|---------------------------------|
| $\beta$ -actin | 5'-TGAGAACAGCTGCATCCACTT-3'    | 5'-CGAAGGCAGCTCGGAGTT-3'        |
| IL-1 $\beta$   | 5'-TCCAATTGGCGGTGATCA-3'       | 5'-TCCAATTGGCGGTGATCA-3'        |
| RIG-I          | 5'-AGAGCAGCGGCGGAATC-3'        | 5'-GGCCATGTAGCTCAGGATGAA-3'     |
| TLR1           | 5'-CCATCCCCAGCAGCTATCA-3'      | 5'-CCTTGGGCCATTCCAAATAA-3'      |
| TLR2           | 5'-TTCTCCCACTTCCGTCTCTTTG-3'   | 5'-TCTTCTTCTCGATGGGTTCCA-3'     |
| TLR3           | 5'-CATTGAGAATCTATCCCTGAGCAA-3' | 5'-TGAGGTTTGTCTGCTTTAGTCCAA-3'  |
| TLR4           | 5'-CCTGCCTGTGCTGAGTTTCA-3'     | 5'-AAGGTGAGAAGTACGCACTAATG-3'   |
| TLR5           | 5'-CTCCTTTTTAAGCCTTGCGGATA-3'  | 5'-TAGCATTCCAAGGCCATGTT-3'      |
| TLR6           | 5'-CACCTCTCTGACATCAGCTTTCTC-3' | 5'-GATATCAAGGCACTGCATCCTATTC-3' |
| TLR7           | 5'-AAACTCTGCCCTGTGATGTCAGT-3'  | 5'-GAATCGCTGTCAAGTGCTTGTC-3'    |
| TLR8           | 5'-AAAAAGCACGTCCCTGAAAGAA-3'   | 5'-TACCTGTCATCTTGGGCATTCC-3'    |
| TLR9           | 5'-TGTCCAGCCTACGAACTCTCAA-3'   | 5'-TTGGGCTCGATGGTCATGT-3'       |
| NLRP3          | 5'-AGCAGATTCCAGTGCATCAAAG-3'   | 5'-CCTGGTGAAGCGTTTGTGAG-3'      |
| ASC            | 5'-GAGCCAAGCCAGCTGGAA-3'       | 5'-CGAAGTGCAGTGCTGGTTTG-3'      |
| Caspase-1      | 5'-TGGTGCTCATGTCTCATGGAA-3'    | 5'-ACATCTGGGACTTCTTCGGAGTAT-3'  |

**Figure S1.**

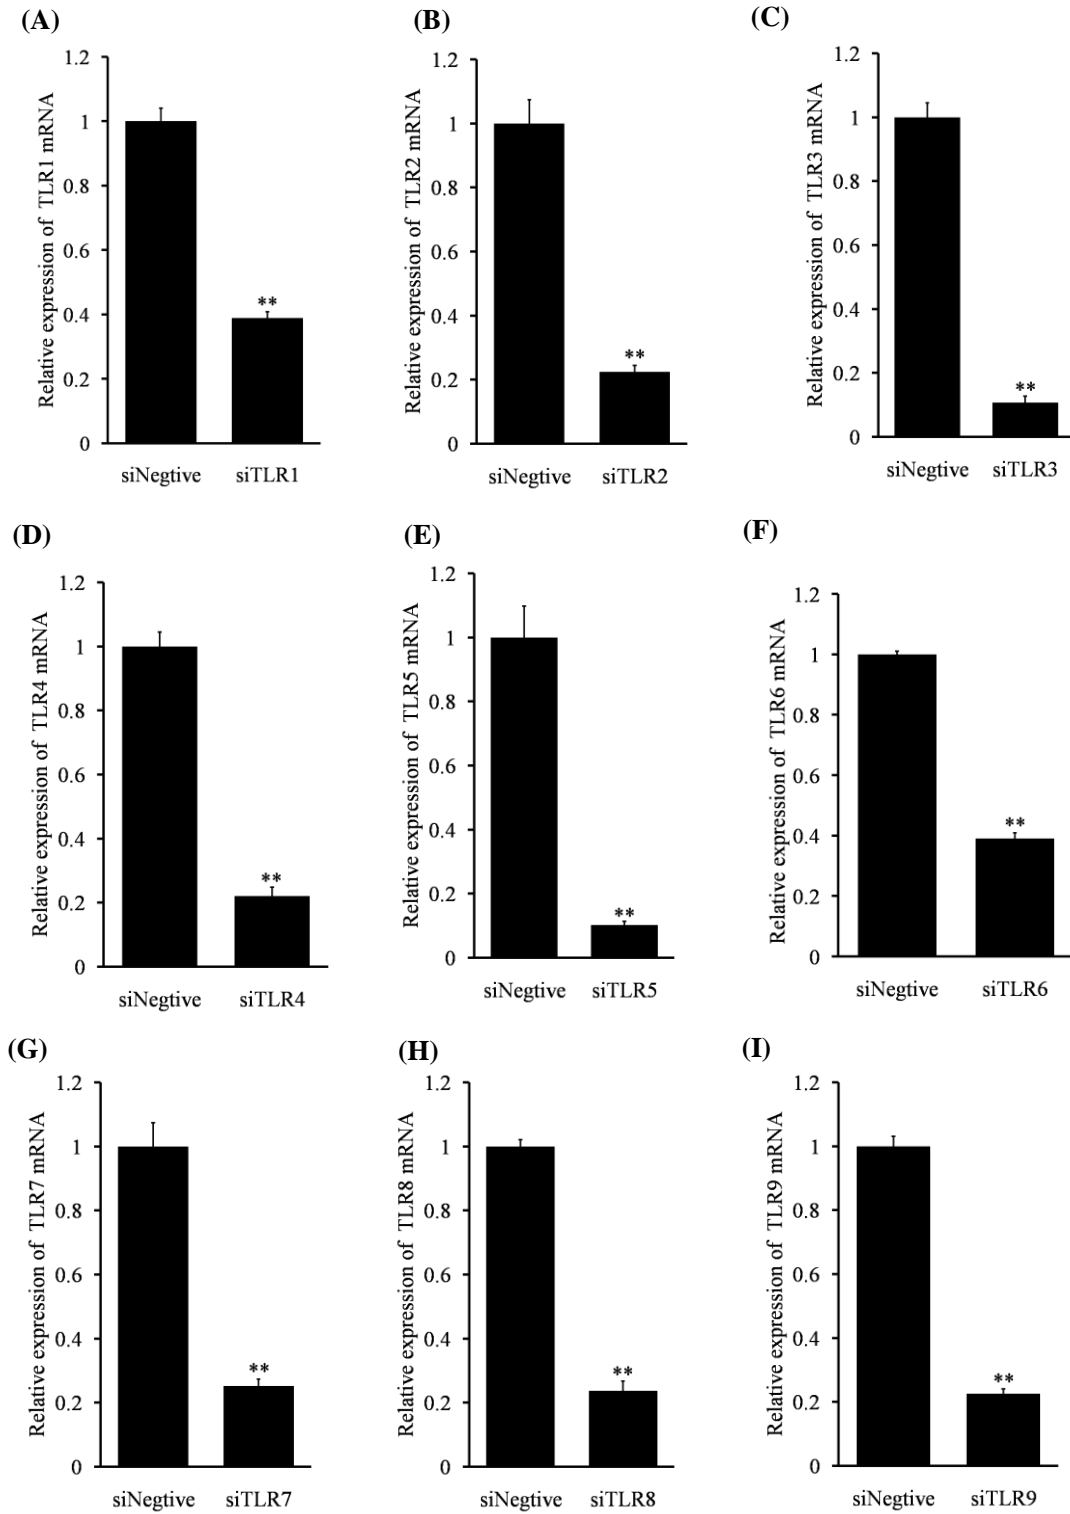

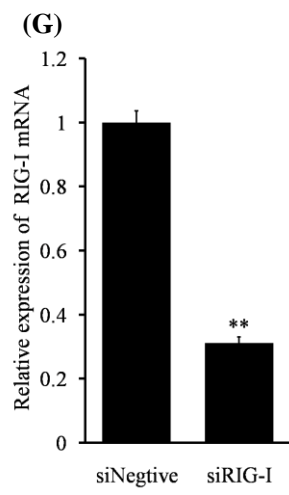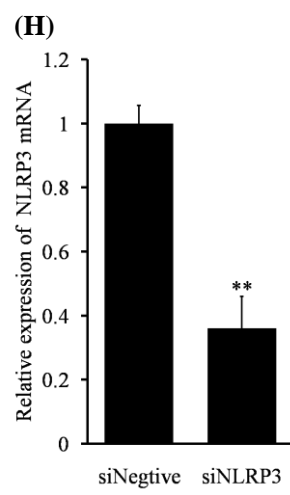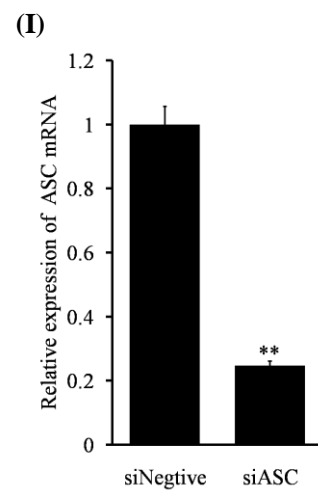

Supplement: f1 [file 403515.f1.pdf]
